# Supplementary material for: The Abiotic Formation of Pyrrole under Volcanic, Hydrothermal Conditions—An Initial Step towards Life’s First Breath?
Source: MDPI journal article supplement (doi:10.3390/life11090980), 2021-09-17
Supplement: s1 [file s1]

## Supplement Materials

|                                                                                    |   |
|------------------------------------------------------------------------------------|---|
| <b>Figure S1.</b> Structural formula of heme b.....                                | 1 |
| <b>Figure S2.</b> Structural formula of chlorophyll b.....                         | 2 |
| <b>Figure S3.</b> Structural formula of cobalamin (vitamin B12).....               | 2 |
| <b>Figure S4.</b> Structural formula of coenzyme F430.....                         | 3 |
| <b>Figure S5.</b> Mass-spectra of Bis(tert-butyldimethylsilyl)-sulfite.....        | 3 |
| <b>Figure S6.</b> Mass-spectra of 2-methylthiazol.....                             | 4 |
| <b>Figure S7.</b> Mass-spectra of 3-tert-Butyldimethylsilyloxypyridine.....        | 4 |
| <br>                                                                               |   |
| <b>Scheme S1.</b> <i>Knorr</i> -pyrrole synthesis.....                             | 5 |
| <b>Scheme S2.</b> Mechanism of the <i>Knorr</i> -pyrrole-synthesis .....           | 5 |
| <b>Scheme S3.</b> Mechanism of the <i>Fischer-Fink</i> -pyrrole-synthesis.....     | 6 |
| <b>Scheme S4.</b> <i>Paal-Knorr</i> -reaction. ....                                | 6 |
| <b>Scheme S5.</b> Mechanism of the <i>Paal-Knorr</i> -pyrrole-synthesis.....       | 6 |
| <b>Scheme S6.</b> Pyrrole synthesis according to <i>Hantzsch</i> . ....            | 7 |
| <b>Scheme S7.</b> Mechanism of the <i>Hantzsch'sche</i> -pyrrole-synthesis .....   | 7 |
| <br>                                                                               |   |
| <b>Table S1.</b> Formation of pyrrole depending on pH.....                         | 8 |
| <b>Table S2.</b> Formation of pyrrole depending on reaction time.....              | 8 |
| <b>Table S3.</b> Formation of pyrrole depending on concentration of catalyst. .... | 9 |

## Figures

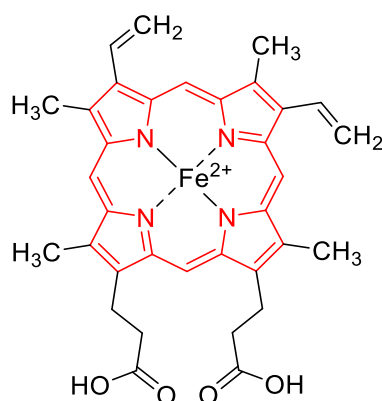

**Figure S1.** Structural formula of heme b. Tetrapyrrole is indicated in red

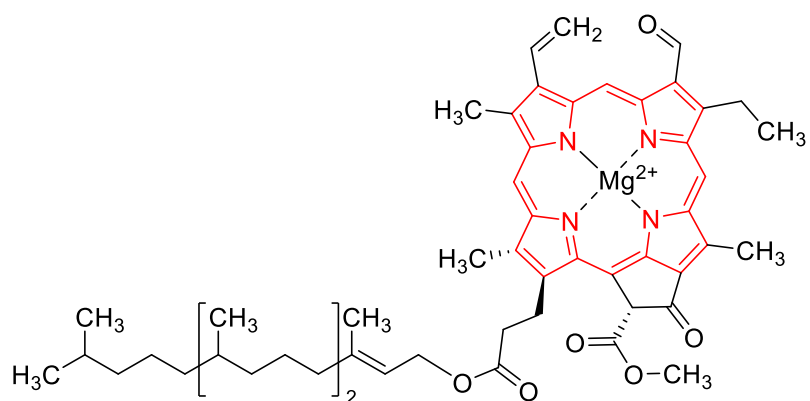

**Figure S2.** Structural formula of chlorophyll b. Tetrapyrrole is indicated in red

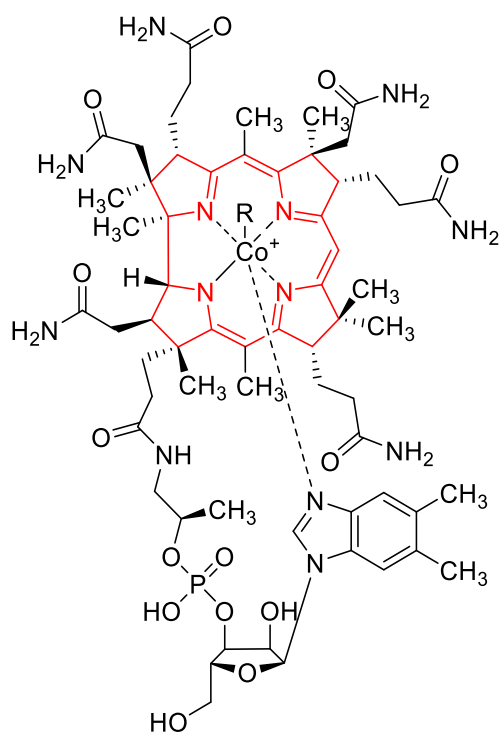

**Figure S3.** Structural formula of cobalamin (vitamin B12). Tetrapyrrole is indicated in red

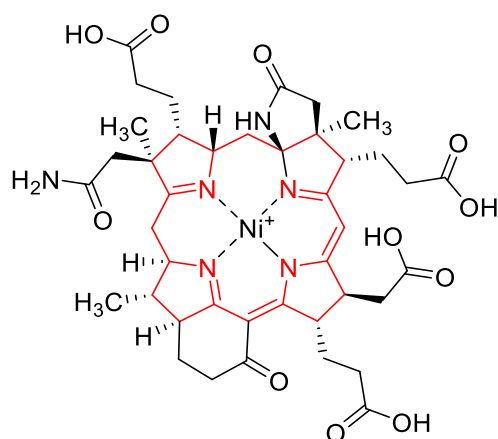

**Figure S4.** Structural formula of coenzyme F430. Tetrapyrrole is indicated in red

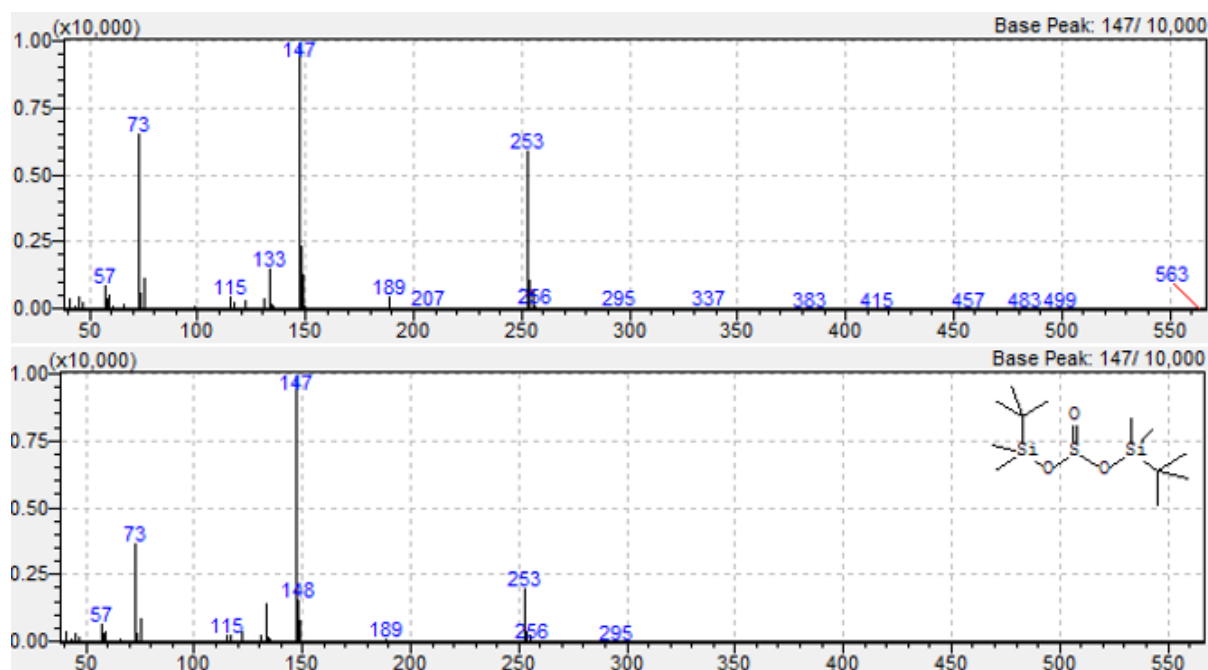

**Figure S5.** Mass-spectra of Bis(tert-butyldimethylsilyl)-sulfite. First spectrum is of a typical run, second spectrum is from NIST.

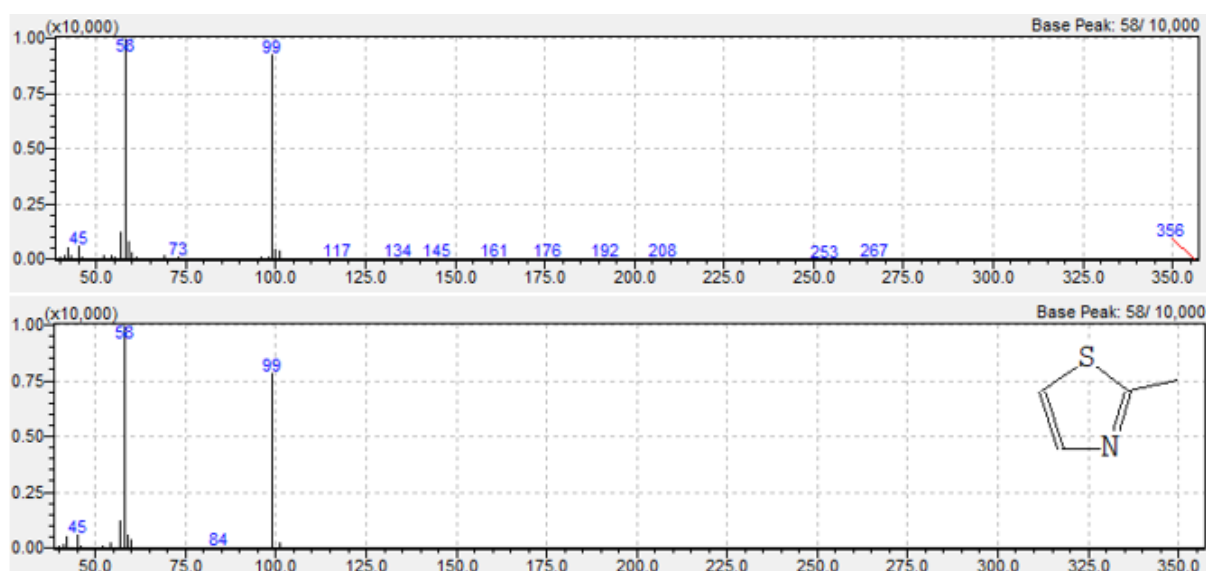

**Figure S6.** Mass-spectra of 2-methylthiazol. First spectrum is of a typical run, second spectrum is from NIST.

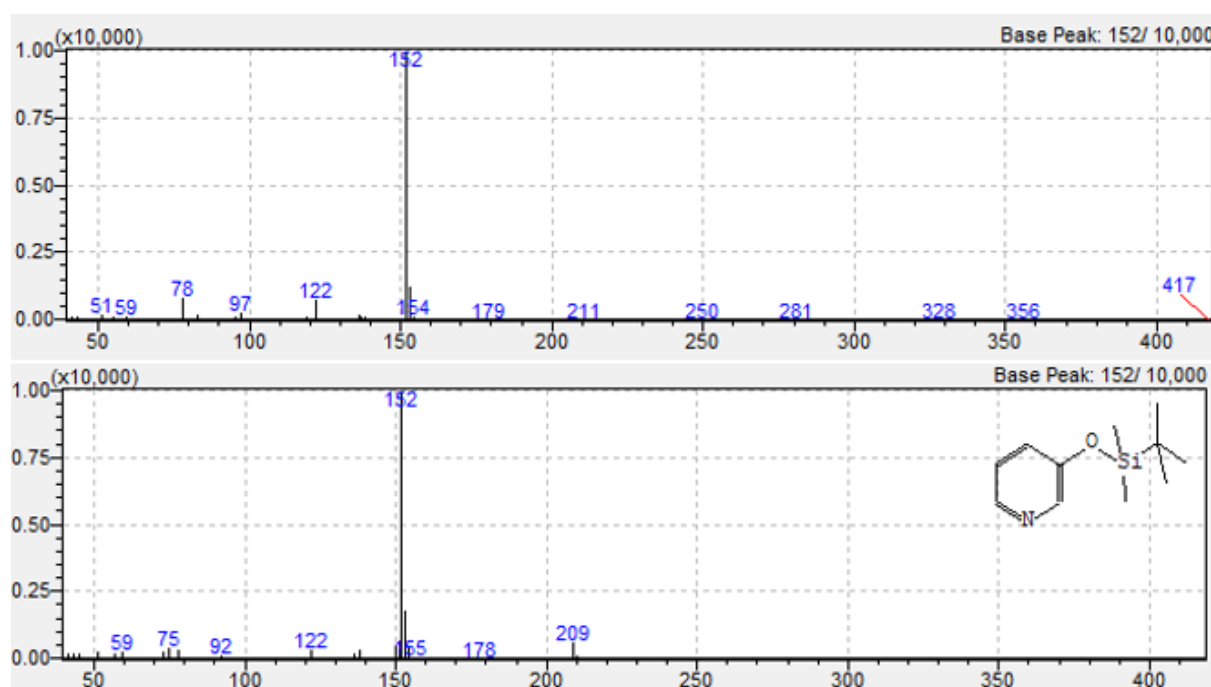

**Figure S7.** Mass-spectra of 3-tert-Butyldimethylsilyloxy pyridine. First spectrum is of a typical run, second spectrum is from NIST.

## Schemes

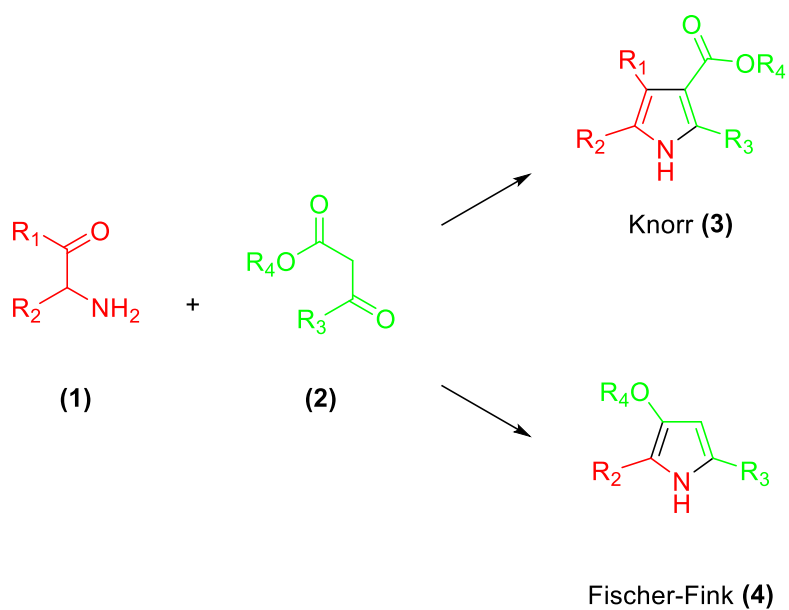

**Scheme S1.** Knorr-pyrrole synthesis. *Knorr*-product (4) as well as *Fischer-Fink*-product (5) can be observed in this reaction

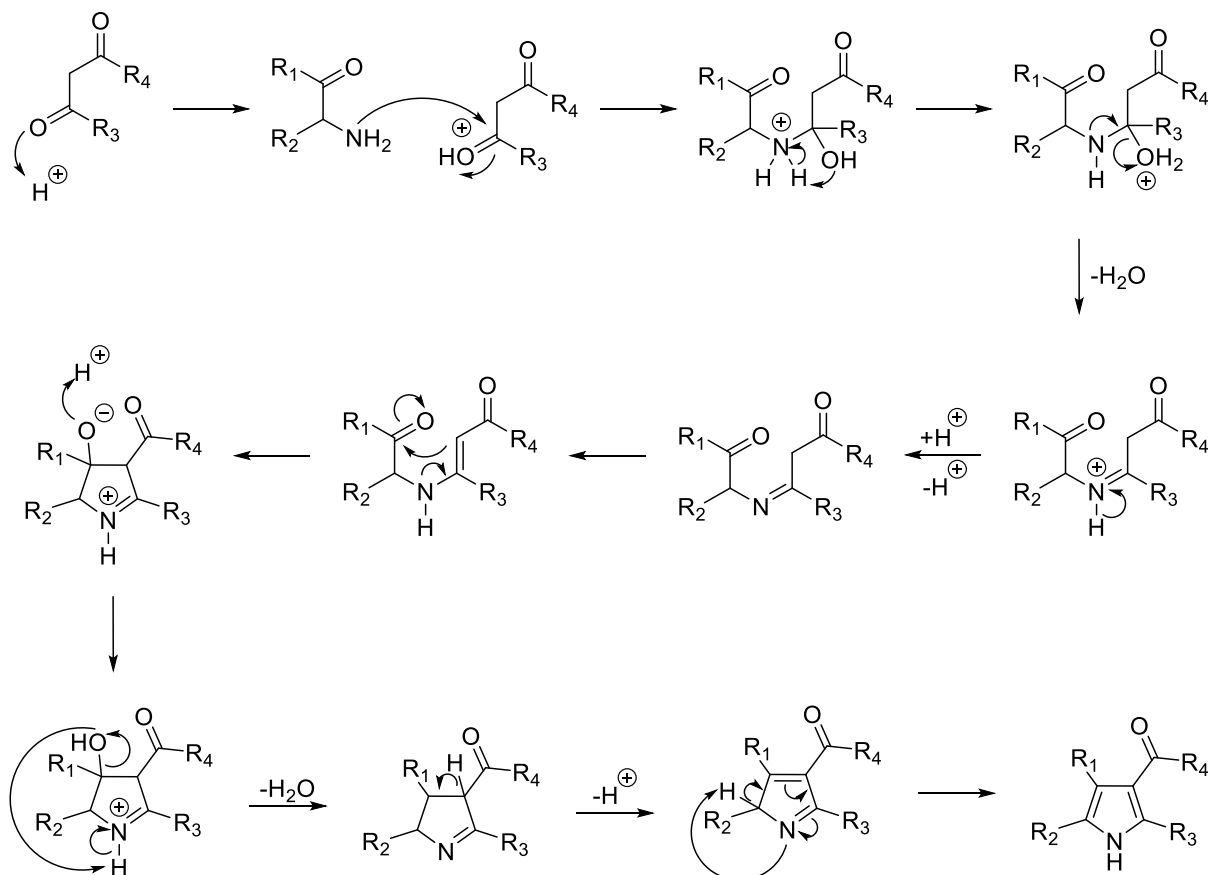

**Scheme S2.** Mechanism of the *Knorr*-pyrrole-synthesis

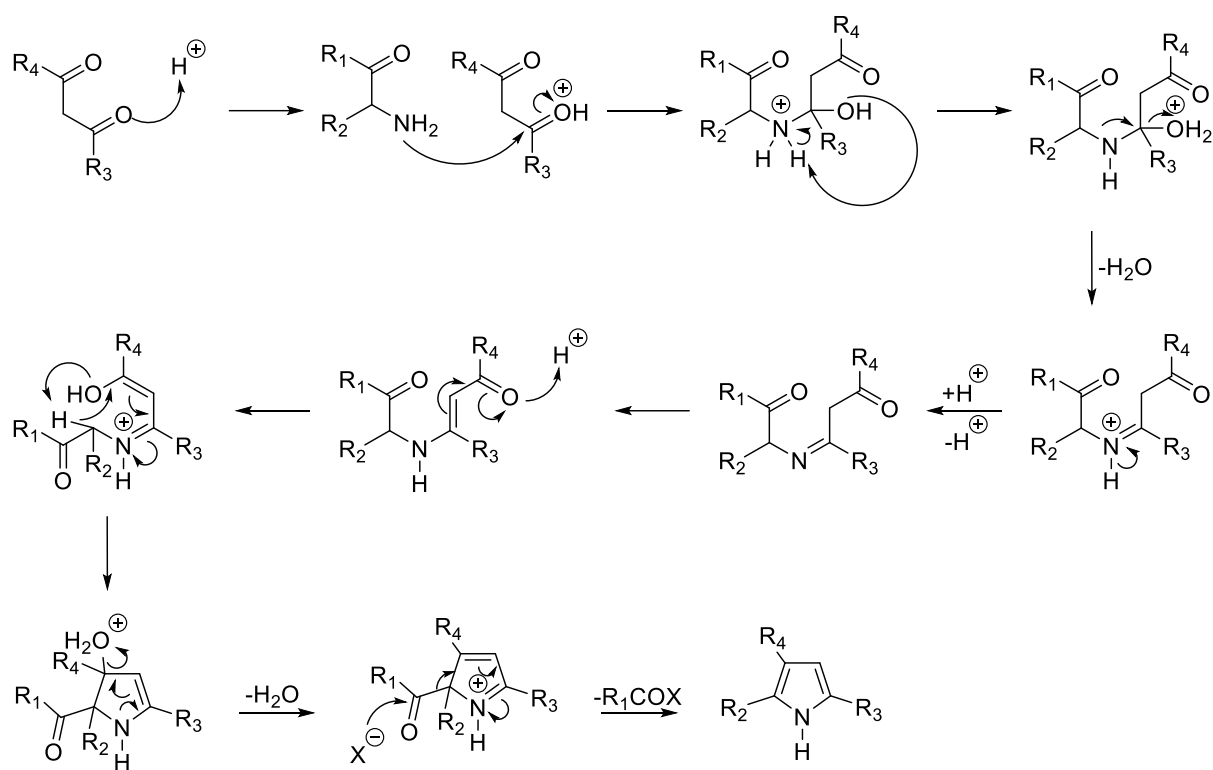

**Scheme S3.** Mechanism of the *Fischer-Fink*-pyrrole-synthesis

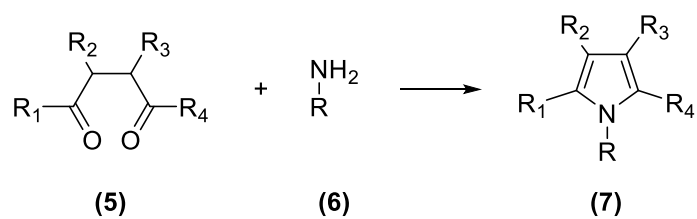

**Scheme S4.** *Paal-Knorr*-reaction.

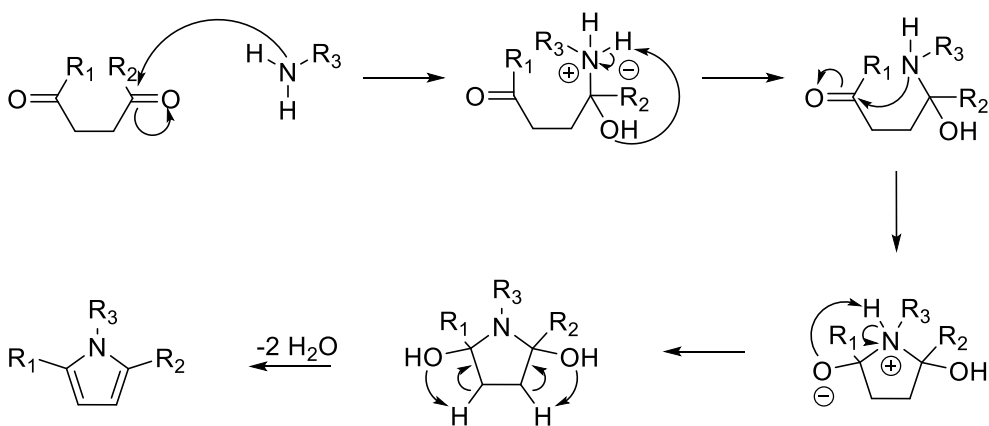

**Scheme S5.** Mechanism of the *Paal-Knorr*-pyrrole-synthesis

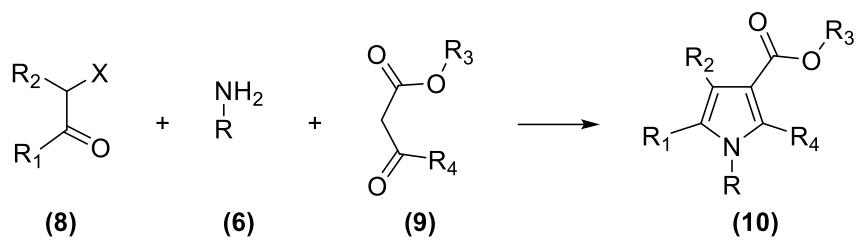

**Scheme S6.** Pyrrole synthesis according to *Hantzsch*.

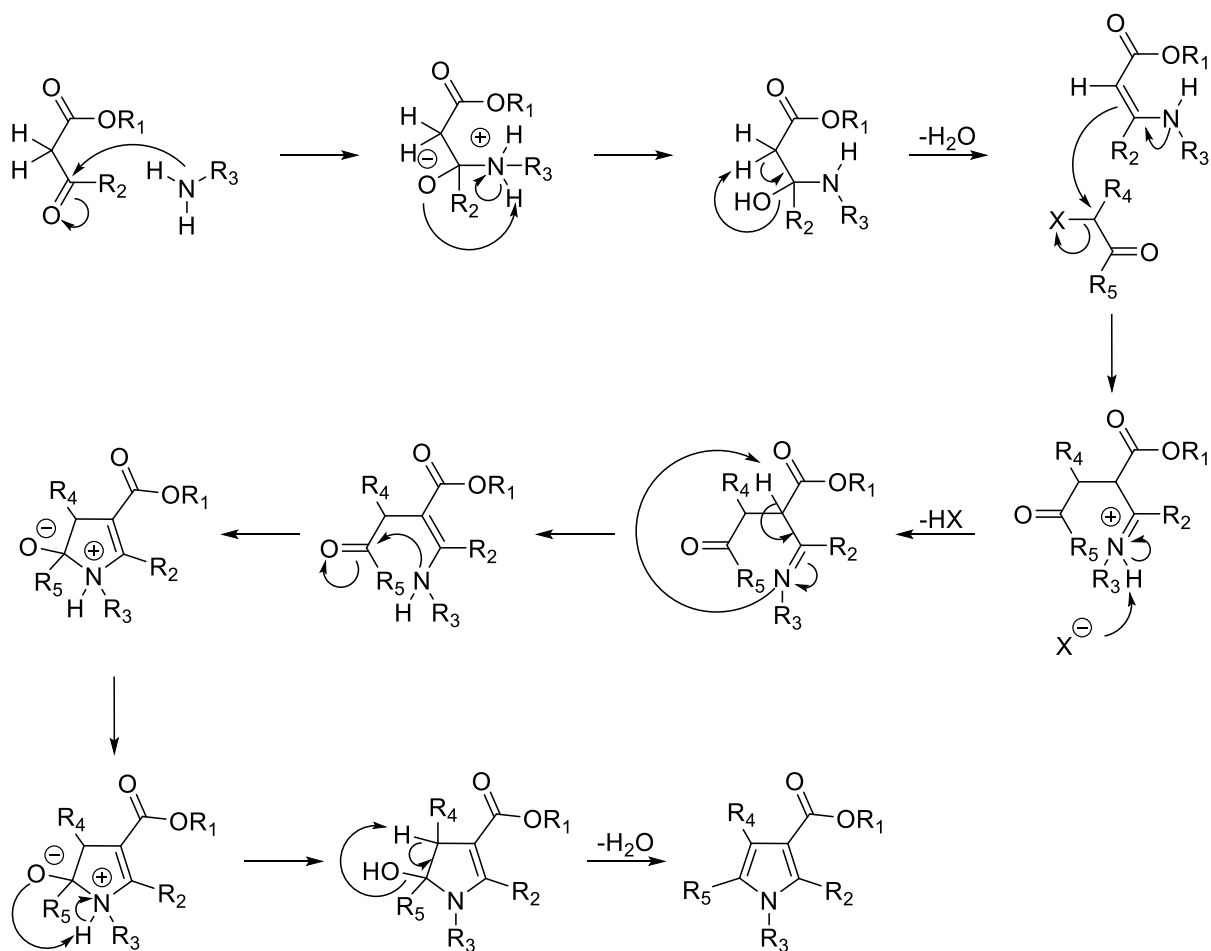

**Scheme S7.** Mechanism of the *Hantzsch'sche*-pyrrole-synthesis

## Tables

If not stated otherwise, all runs were performed with 1.00 mmol NiSO<sub>4</sub>, 1.00 mmol Na<sub>2</sub>S, 1 mL NaOH, 60 mL CO and 60 mL acetylene for one day at 105 °C. A total reaction volume of 5 mL was achieved by adding argon-saturated water. Yields are given at mol% conversion based on NH<sub>4</sub>Cl. pH was measured at the end of the reaction time.

**Table S1.** Formation of pyrrole depending on pH. Different values were achieved by adding different amounts of 1 M NaOH (run 5, 7, 8, 10, 11, 12, 14), Ca(OH)<sub>2</sub> (run 6, 9, 10), 1 M H<sub>2</sub>SO<sub>4</sub> (run 1-3) or none of them (run 4). Other parameters as stated above. The defined standard run is run 8 in this table (1 mL NaOH (1M)).

| Run | pH   | NaOH<br>(1 M) | Ca(OH) <sub>2</sub> | H <sub>2</sub> SO <sub>4</sub><br>(1 M) | pyrrole | yield |
|-----|------|---------------|---------------------|-----------------------------------------|---------|-------|
|     |      | [mmol]        | [mmol]              | [mmol]                                  | [μM]    | [%]   |
| 1   | 1.8  | -             | -                   | 1                                       | <0.1    | <0.01 |
| 2   | 2.4  | -             | -                   | 0.5                                     | <0.1    | <0.01 |
| 3   | 3.8  | -             | -                   | 0.1                                     | <0.1    | <0.01 |
| 4   | 6.8  | -             | -                   | -                                       | 0.71    | 0.071 |
| 5   | 7.1  | 0.1           | -                   | -                                       | 0.65    | 0.065 |
| 6   | 7.6  | -             | 0.3                 | -                                       | 1.25    | 0.546 |
| 7   | 7.8  | 0.5           | -                   | -                                       | 2.53    | 0.253 |
| 8   | 9.1  | 1.0           | -                   | -                                       | 11.38   | 1.138 |
| 9   | 9.4  | -             | 1.3                 | -                                       | 1.70    | 0.17  |
| 10  | 9.6  | 1.5           | -                   | -                                       | 1.70    | 0.17  |
| 11  | 10.3 | 2.0           | -                   | -                                       | 0.75    | 0.075 |
| 12  | 10.9 | 3.0           | -                   | -                                       | 0.40    | 0.04  |
| 13  | 10.9 | -             | 2.6                 | -                                       | 0.18    | 0.018 |
| 14  | 11.3 | 4.0           | -                   | -                                       | 0.16    | 0.016 |

**Table S2.** Formation of pyrrole depending on reaction time. Other parameters as stated above. The defined standard run is run 19 in this table (1 d).

| Run | t <sub>reac</sub> | pH  | pyrrole | yield |
|-----|-------------------|-----|---------|-------|
|     | [h]               |     | [μM]    | [%]   |
| 15  | 0.00              | 8.7 | <0.1    | <0.01 |
| 16  | 0.08              | 8.8 | <0.1    | <0.01 |
| 17  | 0.17              | 8.8 | <0.1    | <0.01 |
| 18  | 0.50              | 8.7 | <0.1    | <0.01 |
| 19  | 1.00              | 8.8 | 0.82    | 0.08  |
| 20  | 2.00              | 8.9 | 1.58    | 0.16  |
| 21  | 4.00              | 8.7 | 2.20    | 0.22  |
| 22  | 8.00              | 8.5 | 3.40    | 0.34  |



|    |      |     |        |       |
|----|------|-----|--------|-------|
| 23 | 24.0 | 9.1 | 11.377 | 1.138 |
| 24 | 48.0 | 8.2 | 3.66   | 0.37  |
| 25 | 72.0 | 8.6 | 2.85   | 0.29  |
| 26 | 96.0 | 8.5 | 1.88   | 0.19  |
| 27 | 120  | 8.2 | 1.52   | 0.15  |
| 28 | 144  | 8.4 | 1.00   | 0.10  |
| 29 | 168  | 8.3 | 0.92   | 0.09  |

**Table S3.** Formation of pyrrole depending on concentration of catalyst. Different concentrations of NiS were achieved by adding different amounts of Na<sub>2</sub>S to a constant amount of NiSO<sub>4</sub> (1 mmol). NiS, the actual catalyst is formed *in situ*. Other parameters as stated above. The defined standard run is run 34 in this table (1.00 mmol Na<sub>2</sub>S).

| Run | Na <sub>2</sub> S | pH   | pyrrole | yield |
|-----|-------------------|------|---------|-------|
|     | [mmol]            |      | [μM]    | [%]   |
| 30  | 0.00              | 6.9  | <0.1    | <0.01 |
| 31  | 0.25              | 7.2  | <0.1    | <0.01 |
| 32  | 0.50              | 7.5  | 0.76    | 0.08  |
| 33  | 0.75              | 7.9  | 0.62    | 0.06  |
| 34  | 1.00              | 9.1  | 11.377  | 1.138 |
| 35  | 1.25              | 9.0  | 4.78    | 0.48  |
| 36  | 1.50              | 9.4  | 2.63    | 0.26  |
| 37  | 1.75              | 9.8  | 0.57    | 0.06  |
| 38  | 2.00              | 11.1 | 0.32    | 0.03  |
